# Supplementary material for: Phase II, Randomized Study of Spartalizumab (PDR001), an Anti–PD-1 Antibody, versus Chemotherapy in Patients with Recurrent/Metastatic Nasopharyngeal Cancer
Source: Oxford University Press journal article supplement (doi:10.1158/1078-0432.ccr-21-0822), 2021-08-25
Supplement: 10780432ccr210822-sup-261735_3_supp_7335863_qy4zj0.docx [file 10780432ccr210822-sup-261735_3_supp_7335863_qy4zj0.docx]

**Supplemental Figure S1. CONSORT diagram**

Intention-to-treat population (*n* = 40)
Safety set (*n* = 39)

Intention-to-treat population (*n* = 82)
Safety set (*n* = 82)

Assessed for eligibility (*n* = 147)

Excluded (*n* = 25)

- Not meeting inclusion criteria (*n* = 23)
- Declined to participate (*n* = 2)

Allocated to spartalizumab (*n* = 82)

- Received treatment (*n* = 82)
- Did not receive treatment (*n* = 0)

Allocated to chemotherapy (*n* = 40)

- Received treatment (*n* = 39)
- Did not receive treatment due to physician’s decision (*n* = 1)

Discontinued spartalizumab due to

- Progressive disease (*n* = 52)
- Death (*n* = 4)
- Physician’s decision (*n* = 1)
- Patient/guardian’s decision (*n* = 1)
- Adverse event (*n* = 1)

Discontinued chemotherapy due to

- Progressive disease (*n* = 32)
- Death (*n* = 2)
- Physician’s decision (*n* = 1)
- Patient/guardian’s decision (*n* = 2)
- Adverse event (*n* = 0)

Randomization (*n* = 122)

Allocation

Follow-up

Analysis
