# Supplementary material for: Phase II, Randomized Study of Spartalizumab (PDR001), an Anti–PD-1 Antibody, versus Chemotherapy in Patients with Recurrent/Metastatic Nasopharyngeal Cancer
Source: Oxford University Press journal article supplement (doi:10.1158/1078-0432.ccr-21-0822), 2021-08-25
Supplement: 10780432ccr210822-sup-261735_3_supp_7335865_qy1svd.docx [file 10780432ccr210822-sup-261735_3_supp_7335865_qy1svd.docx]

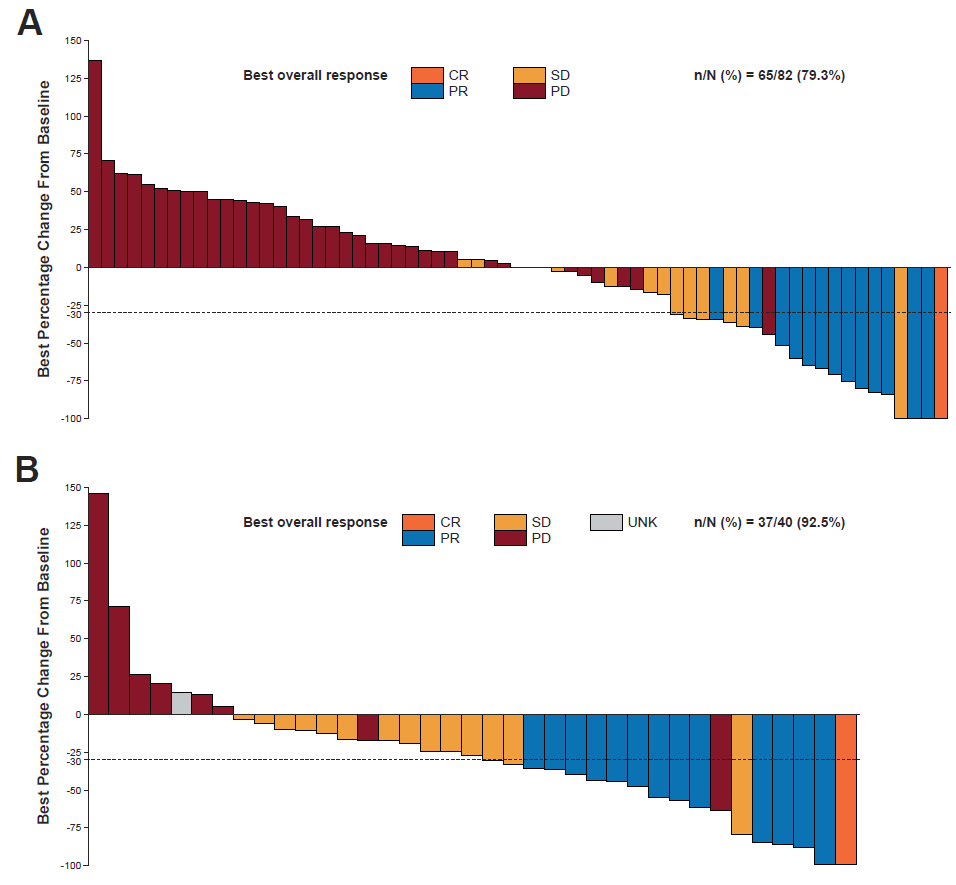
**Supplemental Figure S3. Best percentage change from baseline in sum of diameters of target lesions for patients treated with spartalizumab (A) and chemotherapy (B)**

CR, complete response; PD, progressive disease; PR, partial response; SD, stable disease; UNK, unknown.
